# Supplementary material for: SERPINE2 Overexpression Is Associated with Poor Prognosis of Urothelial Carcinoma
Source: MDPI journal article supplement (doi:10.3390/diagnostics11101928), 2021-10-18
Supplement: s1 [file s1]

# Supplemental Materials

Supplementary Table S1. The summary of the pTNM stage of the cohort.

| UTUC (n = 117) |            | UBUC (n = 84) |           |
|----------------|------------|---------------|-----------|
| T stage        |            | T stage       |           |
| Ta             | 28(23.9%)  | Ta            | 32(38.1%) |
| T1             | 35(29.9%)  | T1            | 26(31.0%) |
| T2             | 10(8.5%)   | T2            | 13(15.5%) |
| T3             | 40(34.2%)  | T3            | 10(11.9%) |
| T4             | 4(3.4%)    | T4            | 3(3.6%)   |
| N stage        |            | N stage       |           |
| N0             | 112(95.7%) | N0            | 80(95.2%) |
| N1             | 2(1.7%)    | N1            | 1(1.2%)   |
| N2             | 3(2.6%)    | N2            | 1(1.2%)   |
|                |            | N3            | 2(2.4%)   |
| M stage        |            | M stage       |           |
| M0             | 96(82.1%)  | M0            | 68(81.0%) |
| M1             | 21(17.9%)  | M1            | 16(19.0%) |

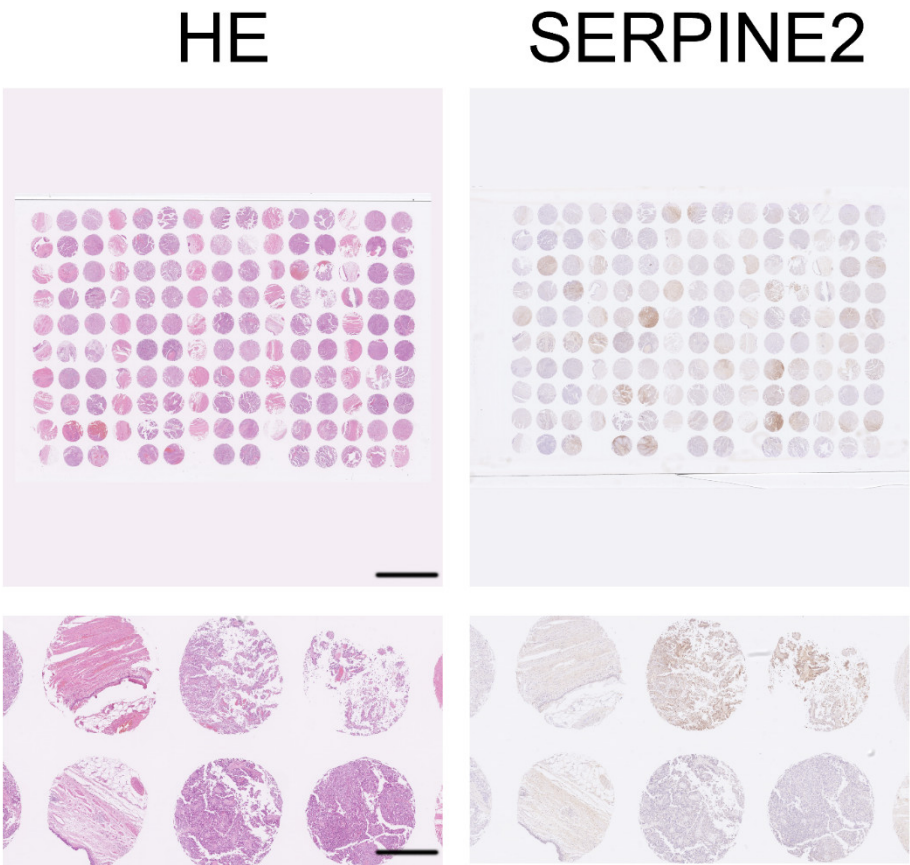

Supplementary Figure S1. The representative photomicrographs of tissue microarray sections. Scale bar in the upper panel, 5 mm; scale bar in the lower panel, 1 mm. The scale bar applies to the panels in the same row.
